# Supplementary material for: Mono V-substituted phosphomolybdic acid with intrinsic oxidase-like activity and near-instantaneous response
Source: Research Square preprint supplement (doi:10.21203/rs.3.rs-7648528/v1), 2025-10-31
Supplement: Supplementary file 1 [file 84a84dbae1c4b93b3e7746a6.docx]

**Supporting Information**

**Mono V-substituted phosphomolybdic acid with intrinsic oxidase-like activity and near-instantaneous response**

QingHui Zhao1,2†, Ning Sheng2†, Zhouzhou Yin3, Bohui Cui1,2, JinHang Guo1,2,Ke Ma2, Hong Zhao1*, Jingquan Sha1,2*

1 School of Pharmacy, Jiamusi University, HeilongJiang, Jiamusi, 154007, P.R. China

2 Laboratory of Functional materials in Universities of Shandong, Department of Chemistry and Chemical Engineering, Jining University, Qufu, Shandong, 273155, P.R China.

3 School of Pharmacy, Jinzhou Medical University, Jinzhou 121001, P. R. China.

**Experimental section**

**1.1 Materials and methods**

The materials and reagents used in this study were all of analytical grade. Ether, Na2HPO4·12H2O, Na2MoO4·2H2O, V2O5, Na2CO3, CaCO3, NaCl, MgSO₄, tyrosine (Tyr), alanine (Ala), glutathione (GSH), cysteine (Cys), uric acid (UA), histidine (His) and glutamic acid (Glu) were acquired from Aladdin Reagent Co., Ltd. (Shanghai, China). Glucose and sucrose were purchased from Macklin. Deionized water was used throughout the whole experimental process.

Ultraviolet (UV) absorption spectra were obtained in the range of 350-750 nm using a TU-1900 double-beam UV-visible spectrophotometer. Fourier transform infrared (FT-IR) spectra were obtained in the range of 4000-400 cm-1 using a NicoletiS10 FT/IR spectrometer with KBr pellets. Powder X-ray diffraction (PXRD) patterns were collected using a MiniFlex 600 X-ray diffractometer, with graphite-monochromatized Cu-Kα radiation (λ = 0.154 nm) and 2θ ranging from 5 to 40°. X-ray photoelectron spectroscopy (XPS) measurements were carried out on a scanning X-ray microprobe (K-Alpha, Thermo Scientific) with Al kα radiation.

**1.2 Synthesis of PMo11V1**

Na2HPO4·12H2O (1.79 g, 5 mmol) and Na2MoO4·2H2O (10.65 g, 44 mmol) were dissolved in 50.0 mL of distilled water, and then the mixture was heated to 110 °C for 30 minutes, by which a solution was obtained and designated as “A”. V2O5 (0.7 g, 4 mmol) was dissolved in 10.0 mL of Na2CO3 solution (1.0 M), and thus solution “B” was formed. Solution “B” was added into solution “A” under magnetic stirring, and then the mixture was heated at 90℃for 30 minutes. After the reaction, the resulting solution was treated with H2SO4 solution (9.0 M, added dropwise with stirring) until the pH value reached 2.0, and then it was cooled to room temperature. Subsequently, 30 mL of diethyl ether was introduced into this step, and then H2SO4 (9.0 M) was slowly added dropwise until the dark red solution turned pale yellow. The deep red oil at the bottom of the separation funnel was evaporated under vacuum so that the diethyl ether could be removed. Finally, the crude product PMo11V1 was dissolved in an appropriate amount of water and then it was recrystallized into a crystalline deep red solid (with a yield higher than 80%).

**1.3 Colorimetric detection of PMo11V1**

100 μL PMo11V1 (0.6 mg mL−1) and 2 mL TMB (1 mM) were successively added into 3 ml acetate buffer solution (pH = 3), Then the mixed solution was heated at 25℃ for 6 minutes, and the absorbance at 661 nm was recorded by UV-visible absorption.

where V was the initial velocity, S was the concentration of the substrate, Km was the Michaelis–Menten constant and Vmax was the maximal reaction velocity.

**1.4 Determination of TA in tea samples**

In order to determine the TA in tea, three tea samples were selected from the local supermarket. 0.2 g of each tea sample was taken and added to 50 mL of ultrapure water. The extractant was boiled for 10 minutes and then naturally cooled to room temperature. Next, the solution was filtered through a 0.22 μm filter membrane, and the filtrate was collected and diluted to 50 mL with ultrapure water. The solution was further diluted for analysis. Under the optimal conditions, 0.5 mL of the diluted filtrate was mixed with TMB (1 mM) and a buffer solution with pH = 2.5. The mixture was then allowed to react at 25℃ for 6 minutes. Finally, the ultraviolet-visible absorbance at 661 nm was measured. The relationship between the reduction value of absorbance at 661 nm (ΔA = A0-Ai) (where A0 and Ai were the absorbance without TA and the absorbance when the TA concentration was i, respectively) and different TA concentrations was used for the calibration curve of TA. The content of TA in the sample was determined by the standard curve method.

**2. Characterization of H5[PMo11VO40]**


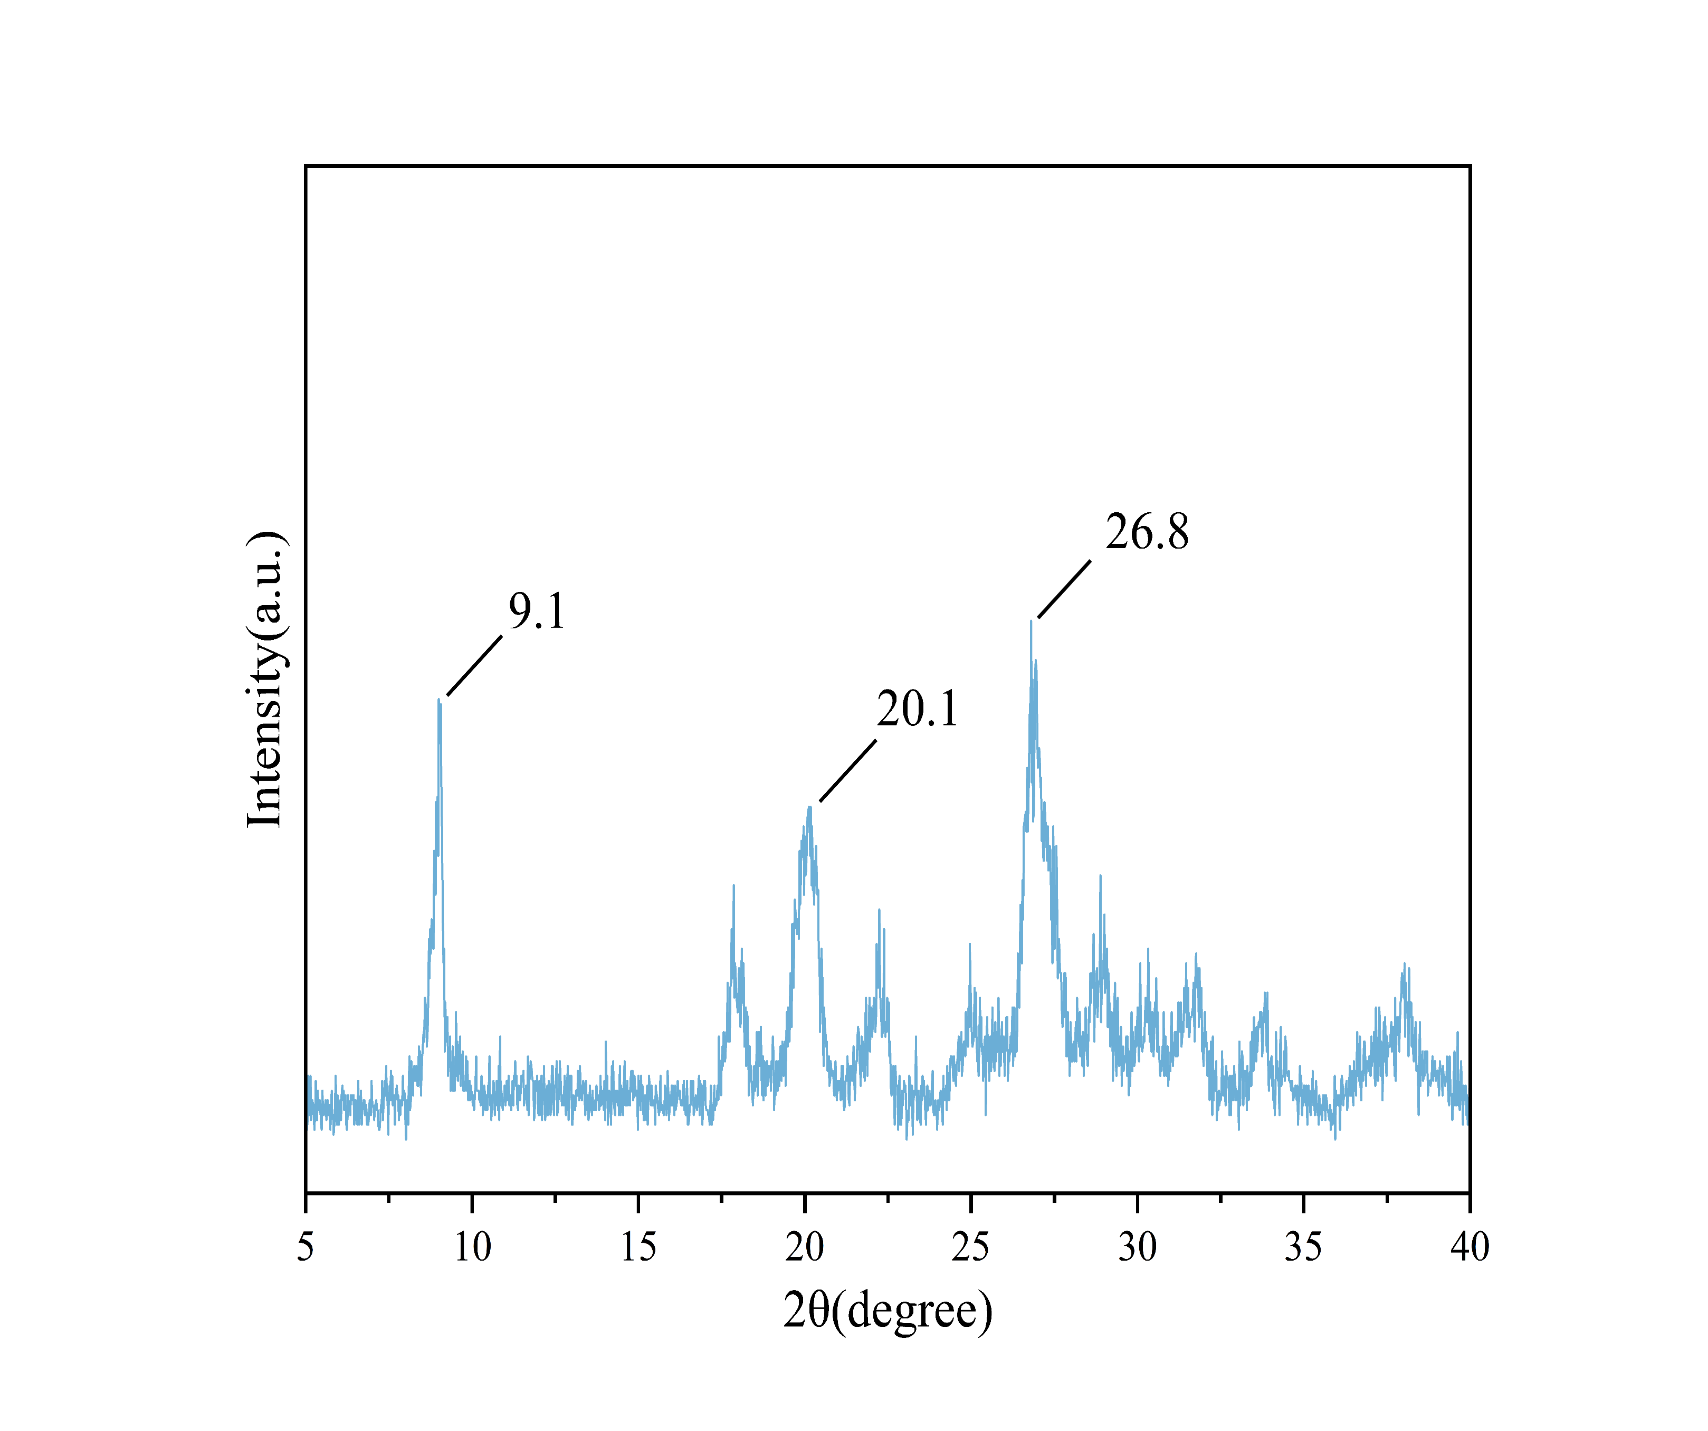


Figure .S1 FT-IR spectra of PMo11V1.


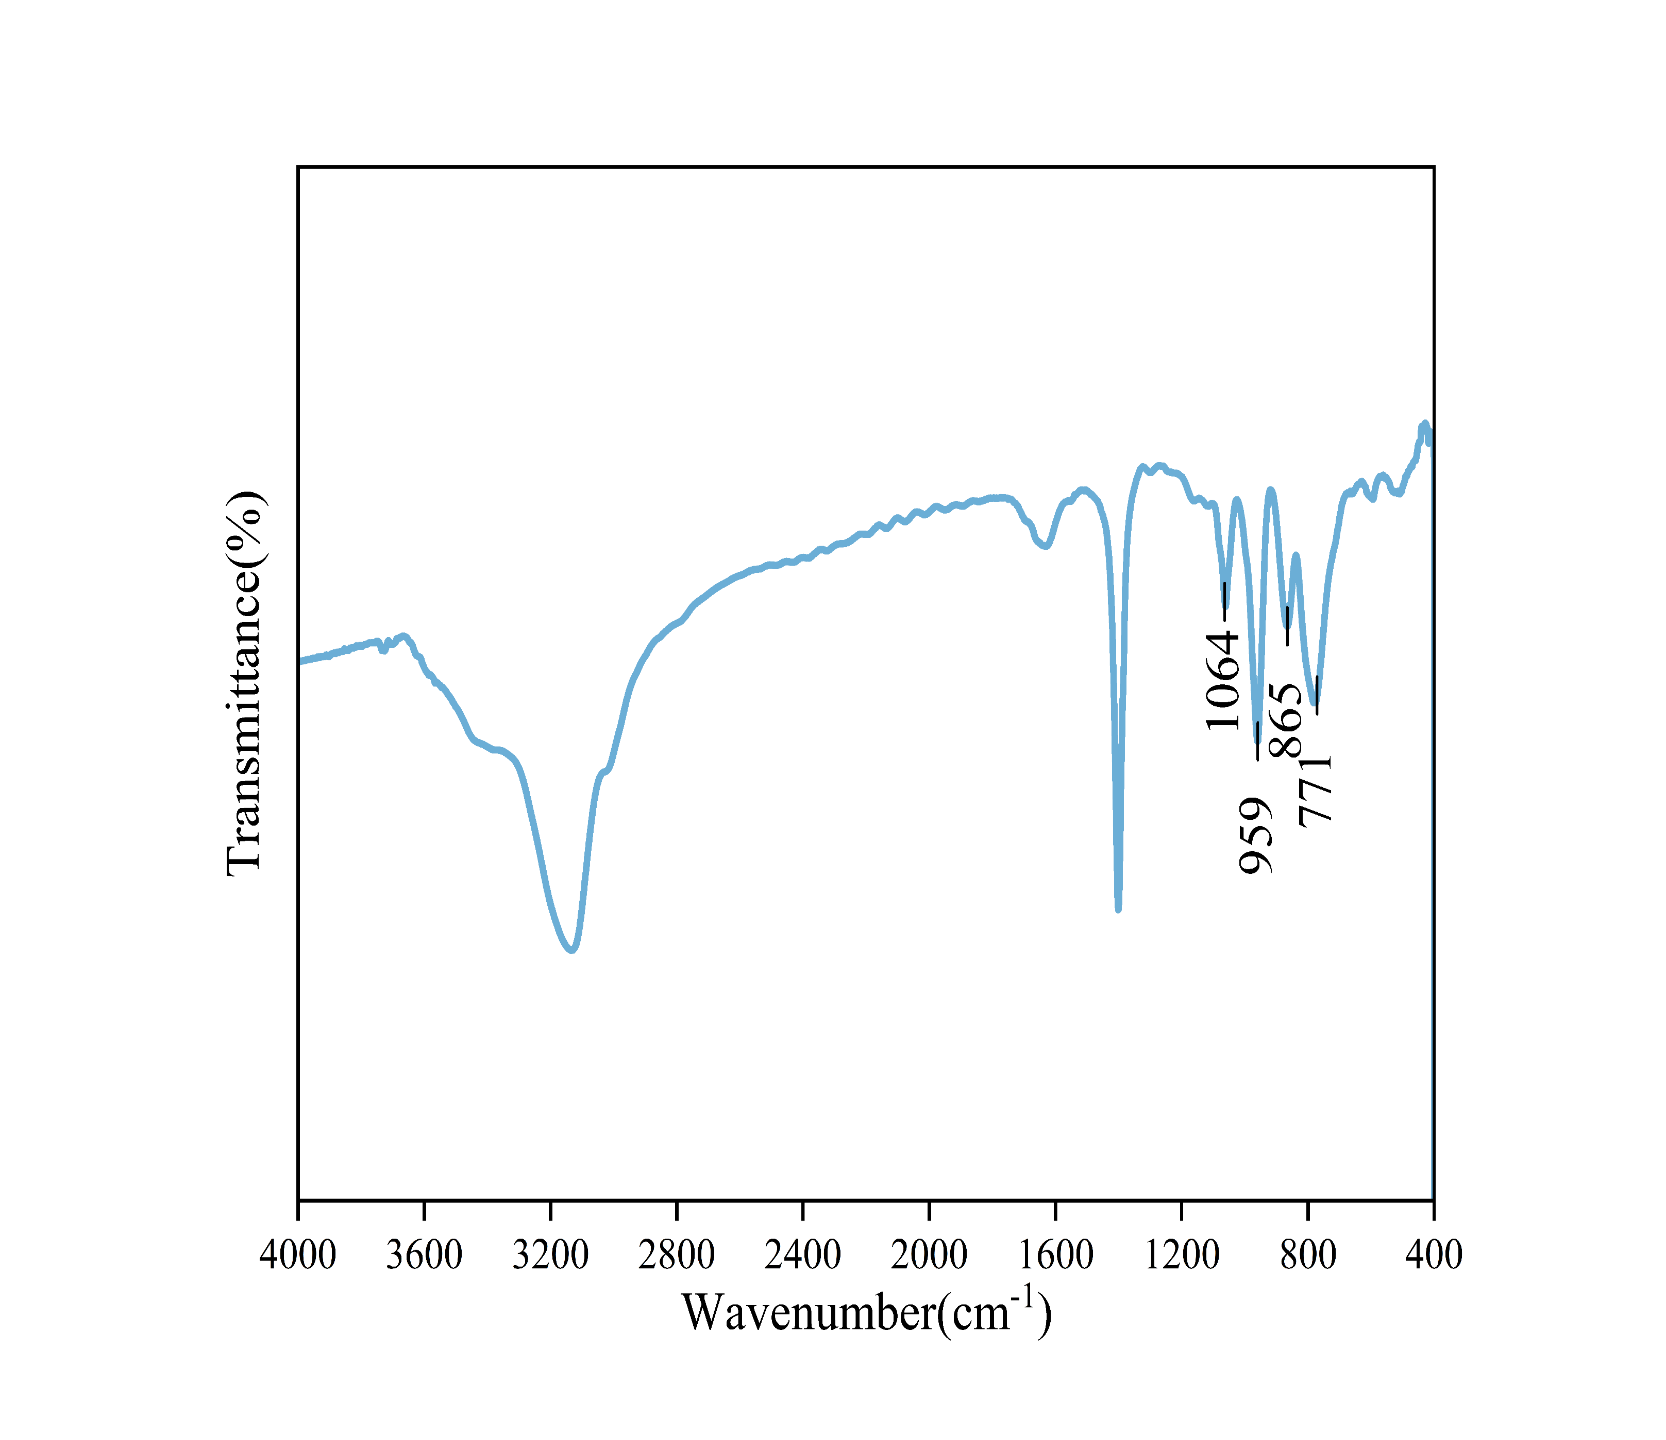


Figure .S2 PXRD (left) spectra of PMo11V1.

**3. Oxidase-like performance of H5[PMo11VO40]**


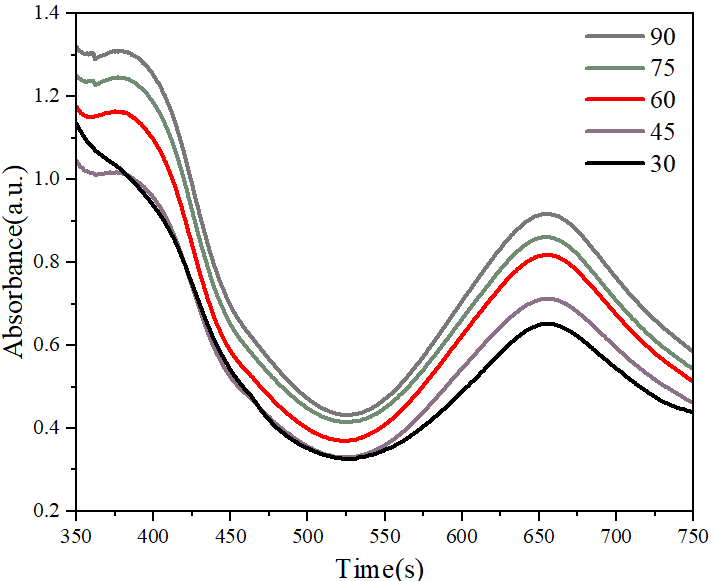


Figure .S3 The optimal Time of PMO11V1

**
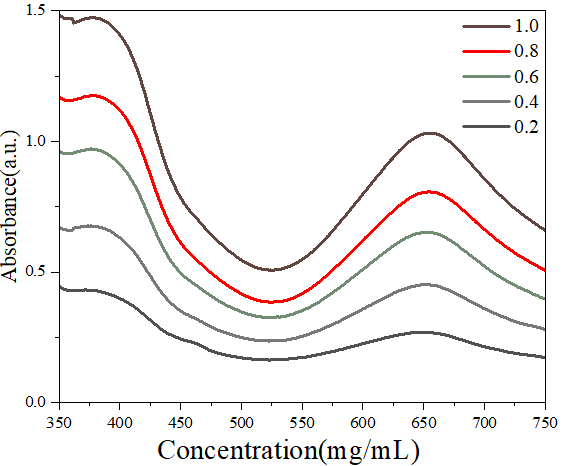
**

Figure .S4 The optimal concentration of PMO11V1

**
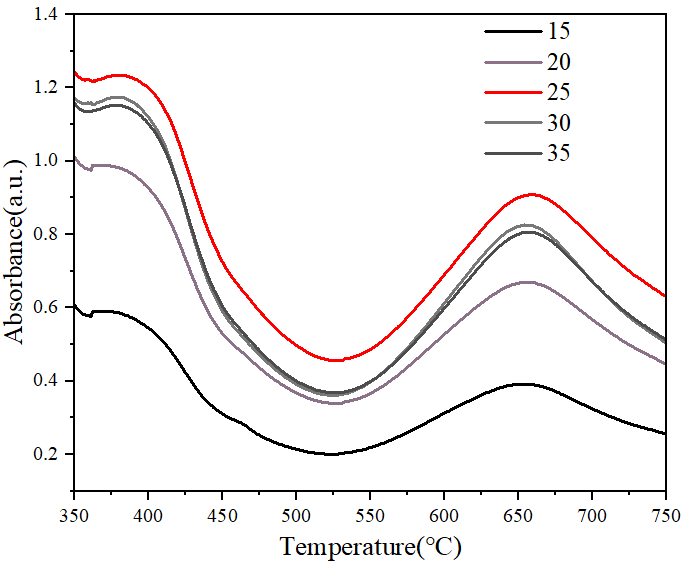
**

Figure.S5 The optimal Temperature of PMO11V1

**
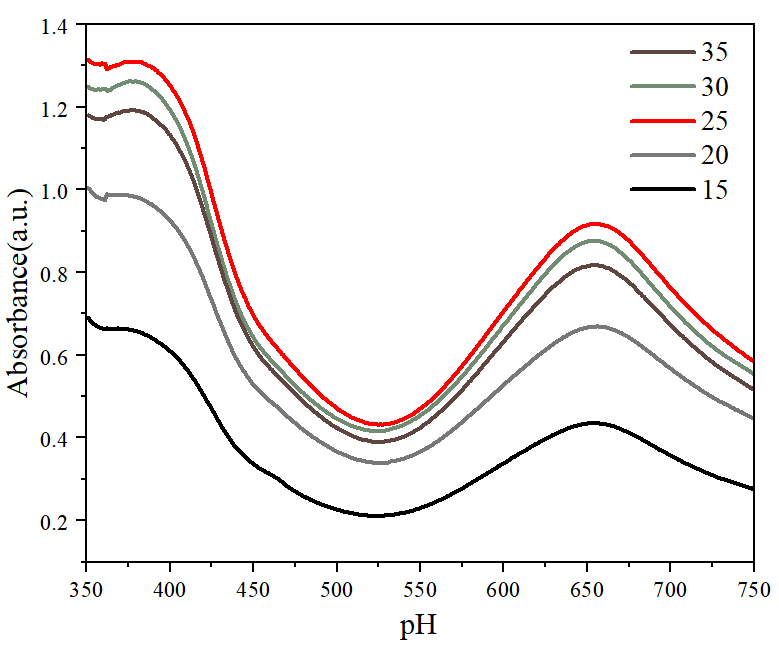
**

Figure.S6 The optimal pH of PMO11V1

**
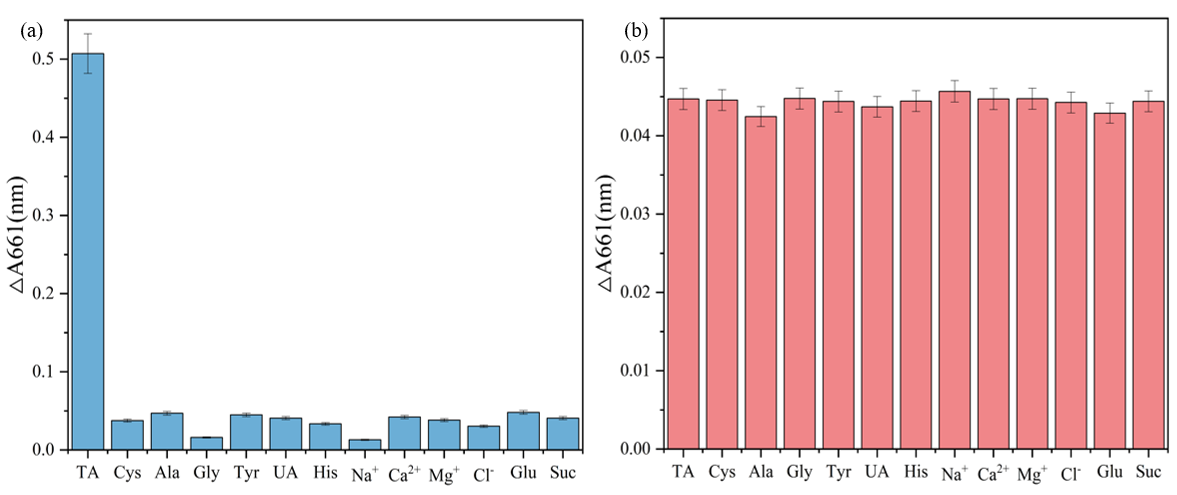
**

Figure. S7 (a) Effects of different interfering substances on the activity of PMo11V1; (b) Selectivity of PMo11V1 to TA sensing
